# Supplementary material for: Modulation of Colorectal Cancer Risk by Polymorphisms in 51Gln/His, 64Ile/Val, and 148Asp/Glu of APEX Gene; 23Gly/Ala of XPA Gene; and 689Ser/Arg of ERCC4 Gene
Source: Hindawi journal article supplement (doi:10.1155/2017/3840243), 2017-01-01
Supplement: f1 [file 3840243.f1.pdf]

Table 1. The distribution of genotypes and the analysis of the odds ratio (OR) for gene-gene interactions: 51Gln/His *APEX* – 64Ile/Val *APEX* in patients with colorectal cancer (CRC) and the control group.

| Genotype               | Patients n=302 | Controls n=302 | OR (95% CI)                | p            |
|------------------------|----------------|----------------|----------------------------|--------------|
| Gln/Gln-Ile/Ile        | 22             | 29             | 1 (ref)                    | -            |
| Gln/Gln-Ile/Val        | 37             | 49             | 0.995 (0.495-2.003)        | 1.000        |
| Gln/Gln-Val/Val        | 8              | 14             | 0.753 (0.269-2.111)        | 0.590        |
| Gln/His-Ile/Ile        | 61             | 42             | 1.915 (0.971-3.777)        | 0.059        |
| Gln/His-Ile/Val        | 84             | 87             | 1.273 (0.678-2.390)        | 0.454        |
| <b>Gln/His-Val/Val</b> | <b>55</b>      | <b>32</b>      | <b>2.266 (1.120-4.585)</b> | <b>0.022</b> |
| His/His-Ile/Ile        | 9              | 6              | 1.977 (0.612-6.385)        | 0.251        |
| His/His-Ile/Val        | 25             | 22             | 1.498 (0.675-3.324)        | 0.320        |
| His/His-Val/Val        | 1              | 21             | -                          | -            |

Table 2. The distribution of genotypes and the analysis of the odds ratio (OR) for gene-gene interactions: 51Gln/His *APEX* – 148Asp/Glu *APEX* in patients with colorectal cancer (CRC) and the control group.

| Genotype               | Patients n=301 | Controls n=301 | OR (95% CI)                | p            |
|------------------------|----------------|----------------|----------------------------|--------------|
| Gln/Gln-Asp/Asp        | 23             | 27             | 1 (ref)                    | -            |
| Gln/Gln-Asp/Glu        | 39             | 54             | 0.848 (0.424-1.694)        | 0.639        |
| Gln/Gln-Glu/Glu        | 3              | 10             | -                          | -            |
| Gln/His-Asp/Asp        | 19             | 33             | 0.676 (0.306-1.493)        | 0.332        |
| <b>Gln/His-Asp/Glu</b> | <b>174</b>     | <b>102</b>     | <b>2.003 (1.091-3.676)</b> | <b>0.023</b> |
| <b>Gln/His-Glu/Glu</b> | <b>8</b>       | <b>26</b>      | <b>0.361 (0.137-0.951)</b> | <b>0.036</b> |
| <b>His/His-Asp/Asp</b> | <b>6</b>       | <b>28</b>      | <b>0.252 (0.089-0.714)</b> | <b>0.007</b> |
| His/His-Asp/Glu        | 20             | 2              | -                          | -            |
| His/His-Glu/Glu        | 9              | 19             | 0.556 (0.211-1.465)        | 0.233        |

Table 3. The distribution of genotypes and the analysis of the odds ratio (OR) for gene-gene interactions: 51Gln/His *APEX* – 23Gly/Ala *XPA* in patients with colorectal cancer (CRC) and the control group.

| Genotype               | Patients n=302 | Controls n=302 | OR (95% CI)                 | p            |
|------------------------|----------------|----------------|-----------------------------|--------------|
| Gln/Gln-Gly/Gly        | 21             | 27             | 1 (ref)                     | -            |
| Gln/Gln-Gly/Ala        | 35             | 43             | 1.047 (0.507-2.159)         | 0.888        |
| Gln/Gln-Ala/Ala        | 9              | 22             | 0.526 (0.201-1.377)         | 0.188        |
| <b>Gln/His-Gly/Gly</b> | <b>6</b>       | <b>35</b>      | <b>0.220 (0.078-0.622)</b>  | <b>0.003</b> |
| <b>Gln/His-Gly/Ala</b> | <b>193</b>     | <b>98</b>      | <b>2.532 (1.362-4.707)</b>  | <b>0.003</b> |
| Gln/His-Ala/Ala        | 4              | 28             | -                           | -            |
| His/His-Gly/Gly        | 2              | 32             | -                           | -            |
| <b>His/His-Gly/Ala</b> | <b>30</b>      | <b>8</b>       | <b>4.821 (1.835-12.670)</b> | <b>0.001</b> |
| His/His-Ala/Ala        | 2              | 9              | -                           | -            |

Table 4. The distribution of genotypes and the analysis of the odds ratio (OR) for gene-gene interactions: 51Gln/His *APEX* – 689Ser/Arg *ERCC4* in patients with colorectal cancer (CRC) and the control group.

| Genotype               | Patients n=302 | Controls n=302 | OR (95% CI)                | p            |
|------------------------|----------------|----------------|----------------------------|--------------|
| Gln/Gln-Ser/Ser        | 31             | 47             | 1 (ref)                    | -            |
| Gln/Gln-Ser/Arg        | 24             | 36             | 1.011 (0.508-2.010)        | 1.000        |
| Gln/Gln-Arg/Arg        | 12             | 9              | 2.022 (0.762-5.365)        | 0.153        |
| Gln/His-Ser/Ser        | 37             | 29             | 1.934 (0.995-3.761)        | 0.051        |
| Gln/His-Ser/Arg        | 123            | 108            | 1.340 (0.994-1.806)        | 0.039        |
| <b>Gln/His-Arg/Arg</b> | <b>39</b>      | <b>24</b>      | <b>2.464 (1.247-4.870)</b> | <b>0.009</b> |
| His/His-Ser/Ser        | 22             | 23             | 1.450 (0.692-3.039)        | 0.325        |
| His/His-Ser/Arg        | 6              | 16             | 0.569 (0.201-1.612)        | 0.286        |
| His/His-Arg/Arg        | 8              | 10             | 1.213 (0.431-3.413)        | 0.718        |

Table 5. The distribution of genotypes and the analysis of the odds ratio (OR) for gene-gene interactions: 64Ile/Val *APEX* – 148Asp/Glu *APEX* in patients with colorectal cancer (CRC) and the control group.

| Genotype               | Patients n=301 | Controls n=301 | OR (95% CI)                | p             |
|------------------------|----------------|----------------|----------------------------|---------------|
| Ile/Ile-Asp/Asp        | 34             | 37             | 1 (ref)                    | -             |
| Ile/Ile-Asp/Glu        | 47             | 29             | 1.764 (0.915-3.401)        | 0.089         |
| Ile/Ile-Glu/Glu        | 11             | 11             | 1.088 (0.418-2.833)        | 0.862         |
| <b>Ile/Val-Asp/Asp</b> | <b>10</b>      | <b>27</b>      | <b>0.403 (0.170-0.955)</b> | <b>0.036</b>  |
| Ile/Val-Asp/Glu        | 126            | 111            | 1.235 (0.726-2.101)        | 0.435         |
| Ile/Val-Glu/Glu        | 9              | 20             | 0.490 (0.196-1.222)        | 0.122         |
| Val/Val-Asp/Asp        | 4              | 24             | -                          | -             |
| <b>Val/Val-Asp/Glu</b> | <b>59</b>      | <b>18</b>      | <b>3.567 (1.765-7.211)</b> | <b>0.0003</b> |
| Val/Val-Glu/Glu        | 1              | 24             | -                          | -             |

Table 6. The distribution of genotypes and the analysis of the odds ratio (OR) for gene-gene interactions: 64Ile/Val *APEX* – 23Gly/Ala *XPA* in patients with colorectal cancer (CRC) and the control group.

| Genotype               | Patients n=304 | Controls n=304 | OR (95% CI)                 | p             |
|------------------------|----------------|----------------|-----------------------------|---------------|
| Ile/Ile-Gly/Gly        | 19             | 21             | 1 (ref)                     | -             |
| Ile/Ile-Gly/Ala        | 64             | 37             | 1.912 (0.911-4.011)         | 0.084         |
| Ile/Ile-Ala/Ala        | 8              | 20             | 0.442 (0.158-1.236)         | 0.117         |
| <b>Ile/Val-Gly/Gly</b> | <b>9</b>       | <b>37</b>      | <b>0.269 (0.103-0.700)</b>  | <b>0.006</b>  |
| Ile/Val-Gly/Ala        | 132            | 99             | 1.474 (0.752-2.889)         | 0.258         |
| <b>Ile/Val-Ala/Ala</b> | <b>6</b>       | <b>23</b>      | <b>0.288 (0.097-0.859)</b>  | <b>0.022</b>  |
| Val/Val-Gly/Gly        | 2              | 37             | -                           | -             |
| <b>Val/Val-Gly/Ala</b> | <b>62</b>      | <b>14</b>      | <b>4.895 (2.093-11.445)</b> | <b>0.0001</b> |
| Val/Val-Ala/Ala        | 2              | 16             | -                           | -             |

Table 7. The distribution of genotypes and the analysis of the odds ratio (OR) for gene-gene interactions: 64Ile/Val *APEX* – 689Ser/Arg *ERCC4* in patients with colorectal cancer (CRC) and the control group.

| Genotype        | Patients n=304 | Controls n=304 | OR (95% CI)         | p     |
|-----------------|----------------|----------------|---------------------|-------|
| Ile/Ile-Ser/Ser | 29             | 33             | 1 (ref)             | -     |
| Ile/Ile-Ser/Arg | 43             | 34             | 1.439 (0.735-2.817) | 0.288 |
| Ile/Ile-Arg/Arg | 19             | 11             | 1.966 (0.803-4.808) | 0.136 |
| Ile/Val-Ser/Ser | 38             | 34             | 1.272 (0.644-2.511) | 0.488 |
| Ile/Val-Ser/Arg | 88             | 107            | 0.936 (0.528-1.660) | 0.823 |
| Ile/Val-Arg/Arg | 21             | 18             | 1.328 (0.595-2.964) | 0.488 |
| Val/Val-Ser/Ser | 25             | 34             | 0.837 (0.408-1.716) | 0.624 |
| Val/Val-Ser/Arg | 21             | 19             | 1.258 (0.567-2.789) | 0.572 |
| Val/Val-Arg/Arg | 20             | 14             | 1.626 (0.698-3.787) | 0.258 |

Table 8. The distribution of genotypes and the analysis of the odds ratio (OR) for gene-gene interactions: 148Asp/Glu *APEX* – 23Gly/Ala *XPA* in patients with colorectal cancer (CRC) and the control group.

| Genotype               | Patients n=301 | Controls n=301 | OR (95% CI)                | p             |
|------------------------|----------------|----------------|----------------------------|---------------|
| Asp/Asp-Gly/Gly        | 18             | 16             | 1 (ref)                    | -             |
| <b>Asp/Asp-Gly/Ala</b> | <b>26</b>      | <b>58</b>      | <b>0.399 (0.176-0.902)</b> | <b>0.025</b>  |
| Asp/Asp-Ala/Ala        | 6              | 14             | 0.381 (0.118-1.227)        | 0.102         |
| <b>Asp/Glu-Gly/Gly</b> | <b>8</b>       | <b>46</b>      | <b>0.155 (0.056-0.424)</b> | <b>0.0001</b> |
| <b>Asp/Glu-Gly/Ala</b> | <b>218</b>     | <b>81</b>      | <b>2.392 (1.164-4.915)</b> | <b>0.015</b>  |
| Asp/Glu-Ala/Ala        | 4              | 31             | -                          | -             |
| Glu/Glu-Gly/Gly        | 4              | 32             | -                          | -             |
| Glu/Glu-Gly/Ala        | 11             | 9              | 1.086 (0.358-3.293)        | 0.888         |
| Glu/Glu-Ala/Ala        | 6              | 14             | 0.381 (0.118-1.227)        | 0.102         |

Table 9. The distribution of genotypes and the analysis of the odds ratio (OR) for gene-gene interactions: 148Asp/Glu *APEX* – 689Ser/Arg *ERCC4* in patients with colorectal cancer (CRC) and the control group.

| Genotype               | Patients n=301 | Controls n=301 | OR (95% CI)                | p            |
|------------------------|----------------|----------------|----------------------------|--------------|
| Asp/Asp-Ser/Ser        | 14             | 27             | 1 (ref)                    | -            |
| Asp/Asp-Ser/Arg        | 21             | 48             | 0.844 (0.370-1.924)        | 0.689        |
| Asp/Asp-Arg/Arg        | 13             | 13             | 1.929 (0.707-5.263)        | 0.198        |
| <b>Asp/Glu-Ser/Ser</b> | <b>69</b>      | <b>49</b>      | <b>2.716 (1.293-5.704)</b> | <b>0.007</b> |
| <b>Asp/Glu-Ser/Arg</b> | <b>126</b>     | <b>82</b>      | <b>2.963 (1.467-5.985)</b> | <b>0.002</b> |
| <b>Asp/Glu-Arg/Arg</b> | <b>37</b>      | <b>27</b>      | <b>2.643 (1.171-5.965)</b> | <b>0.018</b> |
| Glu/Glu-Ser/Ser        | 8              | 25             | 0.617 (0.221-1.720)        | 0.354        |
| Glu/Glu-Ser/Arg        | 4              | 27             | -                          | -            |
| Glu/Glu-Arg/Arg        | 9              | 3              | -                          | -            |

Table 10. The distribution of genotypes and the analysis of the odds ratio (OR) for gene-gene interactions: 23Gly/Ala *XPA* – 689Ser/Arg *ERCC4* in patients with colorectal cancer (CRC) and the control group.

| Genotype               | Patients n=304 | Controls n=304 | OR (95% CI)                 | p             |
|------------------------|----------------|----------------|-----------------------------|---------------|
| Gly/Gly-Ser/Ser        | 12             | 21             | 1 (ref)                     | -             |
| Gly/Gly-Ser/Arg        | 13             | 49             | 0.464 (0.182-1.184)         | 0.105         |
| Gly/Gly-Arg/Arg        | 6              | 25             | 0.420 (0.135-1.312)         | 0.130         |
| <b>Gly/Ala-Ser/Ser</b> | <b>76</b>      | <b>57</b>      | <b>2.333 (1.061-5.131)</b>  | <b>0.032</b>  |
| <b>Gly/Ala-Ser/Arg</b> | <b>135</b>     | <b>77</b>      | <b>3.068 (1.431-6.577)</b>  | <b>0.003</b>  |
| <b>Gly/Ala-Arg/Arg</b> | <b>47</b>      | <b>16</b>      | <b>5.141 (2.073-12.749)</b> | <b>0.0003</b> |
| Ala/Ala-Ser/Ser        | 4              | 23             | -                           | -             |
| Ala/Ala-Ser/Arg        | 3              | 34             | -                           | -             |
| Ala/Ala-Arg/Arg        | 8              | 2              | -                           | -             |
